# Supplementary material
Source: PubMed Central journal article supplement (PMC3529060)
Supplement: 1218674109_pnas.201218674SI.pdf [file 1218674109_pnas.201218674SI.pdf]

# Supporting Information

Niu et al. 10.1073/pnas.1218674109

## SI Materials and Methods

**Bacteria and Culture.** *Anaplasma phagocytophilum* (*Ap*) HZ strain (1) was cultured in human promyelocytic leukemia HL-60 cells (ATCC), and *Ehrlichia chaffeensis* (Arkansas strain) (2) was cultured in human acute leukemia THP-1 cells (ATCC) in complete RPMI1640 medium supplemented with 10% (vol/vol) FBS and 2 mM L-glutamine. RF/6A cells (ATCC) and HEK293 cells (ATCC) were cultured in advanced MEM and DMEM, respectively. Cultures were incubated at 37 °C under 5% CO<sub>2</sub> in a humidified atmosphere. Host cell-free *Ap* was prepared by sonication as described (3). Cells were infected with *Ap* or *E. chaffeensis* at a multiplicity of infection of 100 unless otherwise indicated.

**Yeast Two-Hybrid System.** A DNA fragment encoding *Anaplasma* translocated substrate 1 (*Ats-1*; amino acids 2–376) was amplified by PCR. This fragment was cloned into the pGBKT7-BD vector (Clontech) followed by transformation into yeast strain AH109 from the Matchmaker GAL4 Two-Hybrid System 3 (Clontech) was the bait. Bait-expressing AH109 was mated with the yeast strain Y187 that had been transformed with a human bone marrow cDNA library in the pACT2-AD vector (Clontech). Mated yeast cells were first grown on low-stringency selection plates (-Leu, -Trp, and -His) and then replated onto high-stringency selection plates (-Leu, -Trp, -His, and -Ade in the presence of X- $\alpha$ -gal). Blue colonies were considered to express putative interacting proteins. Plasmids from positive clones were purified from yeast cells using the ChargeSwitch Plasmid Yeast Mini kit (Invitrogen). Inserts from the pACT2-AD library were transformed into *Escherichia coli* TOP10F' competent cells (Invitrogen), purified, and sequenced.

**Cloning and Cell Transfection.** DNA fragments encoding *Ats-1* and its mutants were amplified by PCR from *Ap* genomic DNA. The DNA fragments encoding Beclin 1 and Beclin 1(1–272), double FYVE-containing protein 1 (DFCP1), Atg14L, and the mitochondria-targeting sequence of human cytochrome *c* oxidase subunit VIII (Cox8A) were amplified by PCR from cDNA from human neutrophils (4). The DNA fragment encoding LC3 was amplified by PCR from pEGFP-LC3 plasmid (5). The DNA fragment encoding Rab7 was amplified by PCR from pEGFP-Rab7 plasmid. The addition of the sequence encoding the HA tag to the 5'-end of the Beclin 1-, DFCP1-, Atg14L-, and LC3-encoding sequences was performed by PCR as described (6). To generate Cox8A-*Ats-1*( $\Delta$ N17)-GFP, two DNA fragments that encode the mitochondria-targeting sequence of Cox8A and *Ats-1*( $\Delta$ N17)-GFP, respectively, were fused by PCR. To make *Ats-1* mitochondria-targeting sequence (MTS) mutants, a series of forward primers encoding desired mutation was used in PCRs to create DNA sequences encoding *Ats-1*( $\Delta$ 4R), *Ats-1*(+4R), and *Ats-1*(4–5AA). PCR products encoding *Ats-1*, *Ats-1* mutants, HA-Beclin 1, HA-DFCP1, HA-Atg14L, HA-LC3, and HA-Rab7 were cloned into pEGFP-N1 (Clontech). All primers used for PCR amplification are listed in Table S1. Plasmids were purified using the EndoFree Plasmid Maxi Kit (Qiagen). Transfection of RF/6A endothelial cells was performed using electroporation as described (7), except that confluent cells were used. HEK293 cells were transfected using Fugene HD (Roche).

**Coimmunoprecipitation.** HEK293 cells cotransfected with plasmids expressing *Ats-1* and HA-Beclin 1, *Ats-1*(90–250)-GFP and HA-Beclin 1(1–272), *Ats-1*(218–376)-GFP and HA-Beclin 1(1–272), *Ats-1*-GFP and HA-Atg14L, *Ats-1*( $\Delta$ N17)-GFP and HA-Atg14L,

Cox8A-*Ats-1*( $\Delta$ N17)-GFP and HA-Atg14L, or *Ats-1*-GFP and Myc-UVRAG were washed two times with PBS and resuspended in immunoprecipitation (IP) buffer [50 mM Hepes (pH 7.4), 150 mM KCl, 1 mM EDTA, 1.0% (vol/vol) Triton X-100, 10% (vol/vol) glycerol, and protease inhibitor mixture (Set III; Calbiochem)]. The lysate was centrifuged at 16,000  $\times$  g for 10 min at 4 °C, and the supernatant was incubated with rabbit anti-*Ats-1*, rabbit preimmune IgG, mouse anti-HA (HA.11, clone 16B12; Covance), or mouse anti-GST (isotype control, clone B-14; Santa Cruz) for 2 h at 4 °C followed by overnight incubation with protein A or protein G agarose beads (Santa Cruz Biotechnology). The beads were washed six times with IP buffer, and the immune complexes were eluted from the beads by boiling in 2 $\times$  SDS/PAGE loading buffer [100 mM Tris-HCl (pH 6.8), 4% (wt/vol) SDS, 10% (vol/vol)  $\beta$ -mercaptoethanol, 0.2% (wt/vol) bromophenol blue, and 20% (vol/vol) glycerol] for 5 min and then subjected to SDS/PAGE and immunoblotting. Primary antibodies for immunoblotting were mouse monoclonal anti-HA (HA.11, clone 16B12; Covance), mouse monoclonal anti-Myc (Invitrogen), and affinity-purified rabbit anti-*Ats-1* (6).

**Colocalization.** RF/6A cells at high confluence were cotransfected with plasmids encoding *Ats-1*-GFP, Cox8A-*Ats-1*( $\Delta$ N17)-GFP, or *Ats-1* with HA-Beclin 1, HA-DFCP1, HA-Atg14L, HA-LC3, or HA-Rab7. Colocalization of *Ats-1* with HA-tagged proteins was determined at 1 d posttransfection (p.t.) HEK293 cells were transfected with plasmid encoding *Ats-1*-GFP. Colocalization of *Ats-1* with endogenous lysosomal-associated membrane protein 1 (LAMP-1) was determined 2 d p.t. RF/6A cells were transfected with plasmid encoding HA-DFCP1, HA-Atg14L, or GFP-LC3 followed by infection with *Ap* at 10 h p.t. to study the colocalization at 2 d postinfection. Cells were fixed in 2% (wt/vol) paraformaldehyde in PBS at room temperature for 30 min followed by permeabilization in PBS containing 0.4% (wt/vol) BSA, 0.2% (wt/vol) gelatin, and 0.3% (wt/vol) saponin solution. Cells were labeled with rabbit anti-*Ats-1*, horse anti-*Ap* (8), mouse monoclonal anti-*Ap* P44 (clone SC11) (9), or mouse monoclonal antibodies against cytochrome *c* (clone 2G8; Santa Cruz Biotechnology), Mn-Sod (clone MnS-1; Alexis), HA, or LAMP-1 (clone H4A3; Developmental Studies Hybridoma Bank). RF/6A cells were transfected with plasmid encoding *Ats-1*-GFP or GFP-LC3 followed by infection with mCherry-expressing *Ap* at 10 h p.t. Live-cell imaging was performed at 2 d postinfection.

**Correlative Light-Electron Microscopy.** Correlative light-electron microscopy was carried out as described (10). Briefly, RF/6A cells transfected with plasmid expressing *Ats-1*-GFP or GFP were grown on CELLocate coverslips (Eppendorf) and fixed at 1 d p.t. with 1.25% (wt/vol) paraformaldehyde, 2.5% (wt/vol) glutaraldehyde, and 0.03% (vol/vol) picric acid in 0.1 M sodium cacodylate buffer (pH 7.4) at 4 °C for 8 h. After washing with the cacodylate buffer, samples were observed under a fluorescence microscope, and the cell with the structure of interest was localized with the help of grid coordinates. Samples were then fixed in 1% (wt/vol) OsO<sub>4</sub> solution containing 1.5% (wt/vol) potassium ferrocyanide in 0.1 M sodium phosphate buffer (pH 7.4) for 1 h at room temperature, dehydrated, and embedded in epoxy resin, which was allowed to polymerize for 48 h, for conventional EM. After removing CELLocate coverslips, the cells were sectioned horizontally to the substrate at 80 nm. Sections were collected on copper grids covered with formvar-carbon supporting film and examined with the H7600 transmission electron microscope.

**LC3 Conversion.** HEK293 cells were transfected with plasmid expressing Ats-1-GFP or GFP. Bafilomycin A1 (Sigma) was added to transfected cells at a final concentration of 400 nM at 20 h p.t. and allowed to incubate with cells for 4 h. To study LC3 conversion in *Ap*-infected HL-60 cells, infected and uninfected (control) cells were harvested at 2 d postinfection (90% infected cells). Cells were lysed and subjected to Western blotting using rabbit anti-LC3 (Novus Biologicals), rabbit antiactin, mouse anti- $\alpha$ -tubulin (Santa Cruz Biotechnology), or mouse anti-GFP and anti-*Ap* P44.

**Ats-1-GFP Turnover.** RF/6A cells transfected with plasmid encoding GFP or Ats-1-GFP were treated with cycloheximide (Sigma) at the final concentration of 20  $\mu$ g/mL at 1 d p.t. Cells were harvested at 0, 4, 8, 24, 48, and 72 h posttreatment and subjected to Western blot analysis using rabbit antiactin (Sigma) and mouse anti-GFP (clone B-2; Santa Cruz Biotechnology).

**Localization of Ats-1 in HL-60 Cells Selectively Permeabilized with Streptolysin O.** The method to selectively permeabilize plasma membranes with streptolysin O (SLO) (11) was used with some modifications. Briefly, *Ap*-infected HL-60 cells were resuspended in serum-free RPMI1640 medium and kept on ice followed by the addition of DTT-activated SLO (Sigma). After incubation on ice for 15 min, cells were washed three times with serum-free RPMI1640 to remove unbound SLO. SLO-treated cells were incubated at 37 °C for 30 min in serum-free RPMI1640 supplemented with 20 mM Hepes (pH 7.5) and 5 mM EGTA to allow oligomerization of SLO and the formation of pores on the plasma membrane. Cells were then immediately fixed in 4% (wt/vol) paraformaldehyde solution and stained with rabbit anti-Ats-1 and mouse anti-P44 followed by incubation with secondary antibodies Alexa Fluor 488-conjugated goat anti-rabbit IgG and Alexa Fluor 555-conjugated goat anti-mouse IgG (Invitrogen) in PBS supplemented with 0.5% (wt/vol) BSA. After washing with PBS, the immunostained cells were incubated with the PGS to permeabilize the membranes and labeled with mouse anti-P44 and Alexa Fluor 350-conjugated goat anti-mouse IgG.

**Phosphorylated Mammalian Target of Rapamycin Level.** RF/6A cells transfected with plasmid encoding GFP or Ats-1-GFP were harvested at 1 d p.t. HL-60 cells infected with host cell-free *Ap* were harvested at 4, 12, 24, 48, and 72 h postinfection. Harvested cells were subjected to Western blot analysis using antibodies against phosphorylated mammalian target of rapamycin (mTOR; S2448; Cell Signaling Technology), P44, and  $\alpha$ -tubulin or actin followed by membrane stripping to disassociate bound antibodies using Western blot stripping buffer (Pierce); they were reprobed with anti-mTOR (Cell Signaling Technology).

**Immuno-EM.** The immunogold method with preembedding gold enhancement was performed as described (12). In brief, cells were fixed in 4% (wt/vol) paraformaldehyde in 0.1 M sodium phosphate buffer (pH 7.4) for 2 h at room temperature and permeabilized in the same buffer containing 0.25% (wt/vol) saponin for 30 min. After blocking for 30 min in the same buffer containing 0.1% (wt/vol) saponin, 10% (wt/vol) BSA, 10% (vol/vol) normal goat serum, and 0.1% (wt/vol) cold-water fish skin gelatin (blocking solution), specimens were incubated with rabbit anti-Ats-1 or mouse anti-GFP overnight followed by incubation with colloidal gold (1.4 nm in diameter; Nanoprobes) conjugated to goat anti-rabbit IgG or anti-mouse IgG in blocking solution for 2 h. After treatment with a gold enhancement kit (GoldEnhance EM; Nanoprobes) for 2 min at room temperature to intensify the signal, the specimens were postfixated in 1% (wt/vol) OsO<sub>4</sub> solution containing 1.5% (wt/vol) potassium ferrocyanide, dehydrated in a series of graded ethanol solutions, and embedded in epoxy resin. Ultra-thin sections were collected, stained

with uranyl acetate and lead citrate, and observed with a Hitachi H7600 transmission electron microscope.

**Subcellular Fractionation by OptiPrep Density Gradient Centrifugation.** Subcellular fractionation was performed as described in the work by Xiong and Rikihisa (13). Briefly *Ap*-infected at 3 d postinfection and uninfected HL-60 cells were homogenized in homogenization buffer [250 mM sucrose, 20 mM Tris-HCl (pH 7.4), 1 mM EDTA] containing protease inhibitor mixture. After removing the unbroken cells and nuclei by centrifugation (500  $\times$  g for 5 min), the supernatant was loaded onto the top of an 11-mL linear 5–25% (vol/vol) OptiPrep (Sigma) gradient prepared with the homogenization buffer. The gradient was centrifuged at 200,000  $\times$  g for 3 h in a Beckman SW41 rotor. Fractions (12 total at 1 mL each) were collected from top to bottom sequentially. Equal aliquots from each fraction were analyzed by immunoblotting using anti-P44, anti-LC3, anticalnexin (Stressgen), anti-LAMP-2 (clone H4B4; Developmental Studies Hybridoma Bank), and anti-EEA1 (BD). To examine the intactness of *Ap* inclusions in density gradient centrifugation, the seventh fraction that contains *Ap* inclusions was treated with pronase (Sigma) at 200  $\mu$ g/mL for 30 min followed by Western blot analysis using anti-P44. As a positive control, flotillin-1, which was in the same fraction as *Ap* inclusions, was treated the same way and detected with antiflotillin-1 antibody (BD).

**Antibody Delivery by Chariot.** Chariot reagent (1  $\mu$ L; Active Motif) was mixed with 100  $\mu$ L PBS containing 1  $\mu$ g purified rabbit anti-Ats-1 or control preimmune rabbit IgG. After incubation for 30 min at room temperature, the complex was added to  $5 \times 10^5$  *Ap*-infected HL-60 cells (1 d postinfection) in 2 mL medium, and these cells were then cultured for an additional 2 d. The infectivity was then determined by Diff-Quik staining. In addition, *Ap* P44, human  $\alpha$ -tubulin, and LC3 were analyzed by Western blotting.

**Effect of Ats-1-GFP on Bacterial Growth.** RF/6A cells were transfected with plasmid expressing Ats-1-GFP or GFP followed by infection with *Ap* or *E. chaffeensis* at 10 h p.t. Infected cells were harvested at 3 d postinfection and analyzed by Western blotting with rabbit anti-actin, mouse anti-P44, and anti-GFP or rabbit antibody against P28 from *E. chaffeensis* (anti-P28) (14).

**beclin 1 Heterozygous-Deficient Mice.** Five each *beclin 1*<sup>+/-</sup> C57BL/6 mice and congenic WT mice (5- to 6-wk-old males) were inoculated i.p. with *Ap*-infected HL-60 cells (>90% cells infected;  $1 \times 10^6$  cells/mouse). Blood samples were collected at 5 d after inoculation and subjected to DNA isolation using a QIAamp DNA blood mini kit; quantitative PCR was performed using *Ap* 16S rDNA and mouse glyceraldehyde 3-phosphate dehydrogenase (G3PDH) gene primers. The protocol for use of animals in this study was approved by the Institutional Laboratory Animal Care and Use Committee.

**Amino Acids Supplementation with 3-Methyladenine, and Effect of Lysosomal, Proteasome Inhibitors, and Diisopropylfluorophosphate on *Ap* Infection.** HL-60 cells at  $3 \times 10^5$  cells were infected with host cell-free *Ap* in 1 mL complete RPMI1640 medium. The media of infected cells were supplemented with complete medium (control) or complete medium containing 5  $\times$  MEM amino acid solution (pH 7.4; Invitrogen), 3-methyladenine (final concentration = 2 mM), or 3-methyladenine (2 mM) and 5  $\times$  MEM amino acids at 1 d postinfection. The *Ap* infection at 3 d postinfection was assessed by quantitative PCR using *Ap* 16S rDNA and human G3PDH gene primers. The primer sequences for human G3PDH gene were described in the work by Zhang et al. (15). To determine the effect of different chemicals on *Ap* infection, HL-60 cells at  $3 \times 10^5$  cells were infected with host cell-free *Ap* in 1 mL complete RPMI1640 medium containing 10 nM Bafilomycin A1 (Sigma), 0.1  $\mu$ M MG-132 (Millipore), 0.1  $\mu$ M diisopropyl-

fluorophosphate (DFP), which was added 1 d postinfection, or solvent control. To determine whether pretreated host cells or host cell-free bacteria by DFP have an effect on the later infection, HL-60 cells or host cell-free *Ap* were treated with DFP (0.1  $\mu$ M) for 0.5 h on ice, washed by centrifugation to remove DFP, and then used for infection. All bacterial infectivity was assayed 3 d postinfection by Diff-Quik staining.

**Imaging and Image Processing.** Imaging for fixed cells was performed using an Eclipse E400 fluorescence microscope with a xenon-mercury light source (Nikon) or a FluoView FV1000 confocal laser scanning microscope (Olympus). Live-cell imaging

was performed with a Deltavision Deconvolution Microscope (Applied Precision). For Western blot analysis, images were captured using a CCD camera (LAS-3000; Fujifilm), and band density was measured with Fujifilm MultiGauge software. Images were processed using Photoshop CS2 software (Adobe).

**Statistical Analysis.** Analyses of significant differences between means were performed using two-tailed Student *t* and ANOVA tests. Data are shown as mean values  $\pm$  SDs from three independent experiments. The dot plot for the experiment of *beclin 1* heterozygous-deficient mice was drawn using GraphPad Prism 5 program (GraphPad).

1. Rikihisa Y, et al. (1997) Ultrastructural and antigenic characterization of a granulocytic ehrlichiosis agent directly isolated and stably cultivated from a patient in New York state. *J Infect Dis* 175(1):210–213.
2. Dawson JE, et al. (1991) Isolation and characterization of an *Ehrlichia* sp. from a patient diagnosed with human ehrlichiosis. *J Clin Microbiol* 29(12):2741–2745.
3. Lin M, den Dulk-Ras A, Hooykaas PJ, Rikihisa Y (2007) *Anaplasma phagocytophilum* Anka secreted by type IV secretion system is tyrosine phosphorylated by Abl-1 to facilitate infection. *Cell Microbiol* 9(11):2644–2657.
4. Niu H, Rikihisa Y, Yamaguchi M, Ohashi N (2006) Differential expression of VirB9 and VirB6 during the life cycle of *Anaplasma phagocytophilum* in human leucocytes is associated with differential binding and avoidance of lysosome pathway. *Cell Microbiol* 8(3):523–534.
5. Kabeya Y, et al. (2000) LC3, a mammalian homologue of yeast Apg8p, is localized in autophagosomal membranes after processing. *EMBO J* 19(21):5720–5728.
6. Niu H, Kozjak-Pavlovic V, Rudel T, Rikihisa Y (2010) *Anaplasma phagocytophilum* Ats-1 is imported into host cell mitochondria and interferes with apoptosis induction. *PLoS Pathog* 6(2):e1000774.
7. Niu H, Yamaguchi M, Rikihisa Y (2008) Subversion of cellular autophagy by *Anaplasma phagocytophilum*. *Cell Microbiol* 10(3):593–605.
8. Zhi N, et al. (2002) Transcript heterogeneity of the p44 multigene family in a human granulocytic ehrlichiosis agent transmitted by ticks. *Infect Immun* 70(3):1175–1184.
9. Kim HY, Rikihisa Y (1998) Characterization of monoclonal antibodies to the 44-kilodalton major outer membrane protein of the human granulocytic ehrlichiosis agent. *J Clin Microbiol* 36(11):3278–3284.
10. Polishchuk RS, et al. (2000) Correlative light-electron microscopy reveals the tubular-saccular ultrastructure of carriers operating between Golgi apparatus and plasma membrane. *J Cell Biol* 148(1):45–58.
11. Campbell AM, Kessler PD, Fambrough DM (1992) The alternative carboxyl termini of avian cardiac and brain sarcoplasmic reticulum/endoplasmic reticulum Ca(2+)-ATPases are on opposite sides of the membrane. *J Biol Chem* 267(13):9321–9325.
12. Hayashi-Nishino M, et al. (2009) A subdomain of the endoplasmic reticulum forms a cradle for autophagosome formation. *Nat Cell Biol* 11(12):1433–1437.
13. Xiong Q, Rikihisa Y (2012) Subversion of NPC1 pathway of cholesterol transport by *Anaplasma phagocytophilum*. *Cell Microbiol* 14(4):560–576.
14. Ohashi N, Zhi N, Zhang Y, Rikihisa Y (1998) Immunodominant major outer membrane proteins of *Ehrlichia chaffeensis* are encoded by a polymorphic multigene family. *Infect Immun* 66(1):132–139.
15. Zhang K, et al. (2007) Constitutive and inducible thymic stromal lymphopoietin expression in human airway smooth muscle cells: role in chronic obstructive pulmonary disease. *Am J Physiol Lung Cell Mol Physiol* 293(2):L375–382.





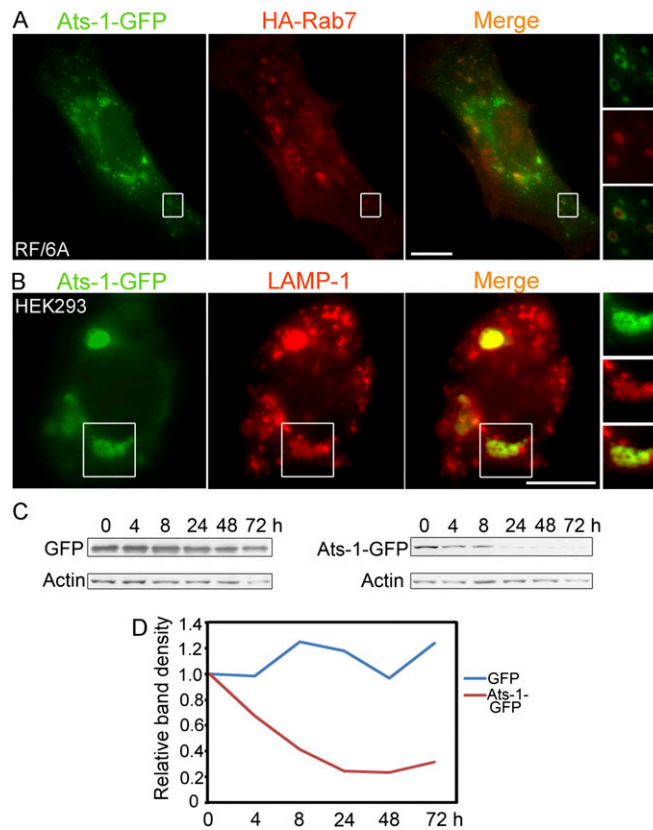

**Fig. 54.** The colocalization of Ats-1-GFP with HA-Rab7 and LAMP-1 and the degradation of Ats-1-GFP in transfected cells. (A) RF/6A cells were cotransfected with plasmids encoding Ats-1-GFP and HA-Rab7 and subjected to immunolabeling. Boxed areas are magnified on the right. (Scale bar: 10  $\mu$ m.) (B) HEK293 cells transfected with plasmid encoding Ats-1-GFP were stained with anti-LAMP-1 antibody, which does not label LAMP-1 in monkey endothelial RF/6A cells. Boxed areas are magnified on the right. (Scale bar: 10  $\mu$ m.) (C) Degradation of GFP and Ats-1-GFP in transfected cells. RF/6A cells transfected with plasmid encoding GFP or Ats-1-GFP were treated with cycloheximide at the final concentration of 20  $\mu$ g/mL at 1 d p.t. Cells were harvested at 0, 4, 8, 24, 48, and 72 h posttreatment and subjected to Western blot analysis using antibodies against actin and GFP. (D) Relative band density ratio of GFP or Ats-1-GFP to actin at different time points posttreatment when GFP or the Ats-1-GFP to actin ratio at 0 h is set to one.

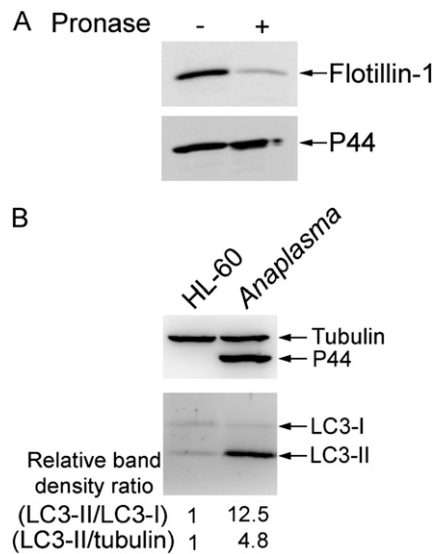

**Fig. S5.** Lack of digestion by pronase for *A. phagocytophilum* P44 in fractionated *A. phagocytophilum* inclusions and LC3 conversion in HL-60 cells infected with *A. phagocytophilum*. (A) *A. phagocytophilum*-infected cells were fractionated by OptiPrep density gradient centrifugation. A portion of fraction containing *A. phagocytophilum* and flotillin-1 was subjected to pronase treatment and Western blot analysis using antibodies against to P44 and flotillin-1. +, pronase treatment; -, no pronase treatment. (B) *A. phagocytophilum*-infected HL-60 cells (90% of cells infected) and uninfected HL-60 cells were harvested and subjected to Western blot analysis using mouse antitubulin, mouse anti-P44, and rabbit anti-LC3. The band density of tubulin, LC3-I, and LC3-II was measured, and the relative ratio of LC3-II/tubulin and LC3-II/LC3-I was calculated for *A. phagocytophilum*-infected HL-60 cells (*Anaplasma*), with the ratios in uninfected HL-60 cells (HL-60) set as one.

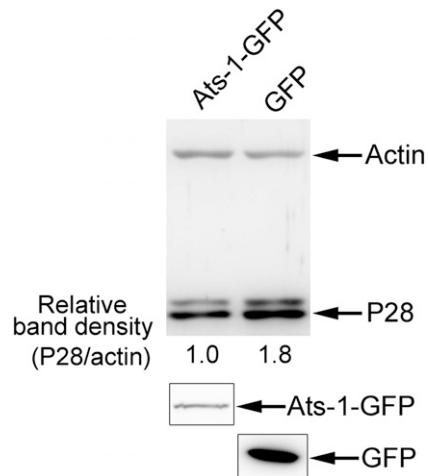

**Fig. S6.** Ats-1-GFP partially inhibits *E. chaffeensis* infection. RF/6A cells were transfected with Ats-1-GFP or GFP alone followed by infection with *E. chaffeensis* at 10 h posttransfection. Infected cells were harvested at 3 d postinfection and probed with rabbit anti-P28 (*E. chaffeensis* major outer membrane protein), antiactin, and anti-GFP in Western blot analysis. The values under the bands show the relative ratios of band intensities of P28 to actin, with the ratio in the Ats-1-GFP lane set as one. The expressions of GFP and Ats-1-GFP in transfected cells are shown at the bottom.





Table S1. Cont.

| Primer ID                  | Sequence                                             | Purpose                                                                     | Note                                                                                   |
|----------------------------|------------------------------------------------------|-----------------------------------------------------------------------------|----------------------------------------------------------------------------------------|
| Cox8A-Mito Reverse         | 5'-TCCAGAAACCAACGAATGGATCTTGGCGCGG-3'                | Amplify DNA fragment encoding MTS of Cox8A for fusion with Ats-1(Δ N17)-GFP | Italicized sequences complementary to the ones encoding the N terminus of Ats-1(Δ N17) |
| Cox8A-Ats-1(Δ N17) Forward | 5'-GATCCATTGG TGGTTTCTGGA TTCACAGCTC CAG-3'          | Amplify DNA fragment encoding Ats-1(Δ N17) to construct Cox8A-Ats-1(Δ N17)  | Italicized sequences complementary to the ones encoding the C terminus of MTS of Cox8A |
| mG3PDH Forward             | 5'-TCAGTGGGCCCTCAGATGC-3'                            | Amplify mouse G3PDH gene in real-time PCR                                   |                                                                                        |
| mG3PDH Reverse             | 5'-ATGGCTCCGTGTTCTAC-3'                              | Amplify mouse G3PDH gene in real-time PCR                                   |                                                                                        |
| 16S rDNA Forward           | 5'-GGTGAATGATGATAGGAATC-3'                           | Amplify <i>A. phagocytophilum</i> 16S rDNA in real-time PCR                 |                                                                                        |
| 16S rDNA Reverse           | 5'-GCTCATCTAATAGGATAAATC-3'                          | Amplify <i>A. phagocytophilum</i> 16S rDNA in real-time PCR                 |                                                                                        |
| Ats-1 (Δ4R) Forward        | 5'-GCAGTCGACGCCACCATGCTAATA AGAATCTGACTAC-3'         | Construct Ats-1(Δ4R)-GFP for ectopic expression                             | Sal I site is underlined                                                               |
| Ats-1 (+4R) Forward        | 5'-GCAGTCGACGCCACCATGCTAATA AGAAGAAGAAATC TGACTAC-3' | Construct Ats-1(+4R)-GFP for ectopic expression                             | Sal I site is underlined                                                               |
| Ats-1 (4-5AA) Forward      | 5'-GCAGTCGACGCCACCATGCTAATA GCTGCGATT TGACTAC-3'     | Construct Ats-1(Δ4R)-GFP for ectopic expression                             | Sal I site is underlined                                                               |

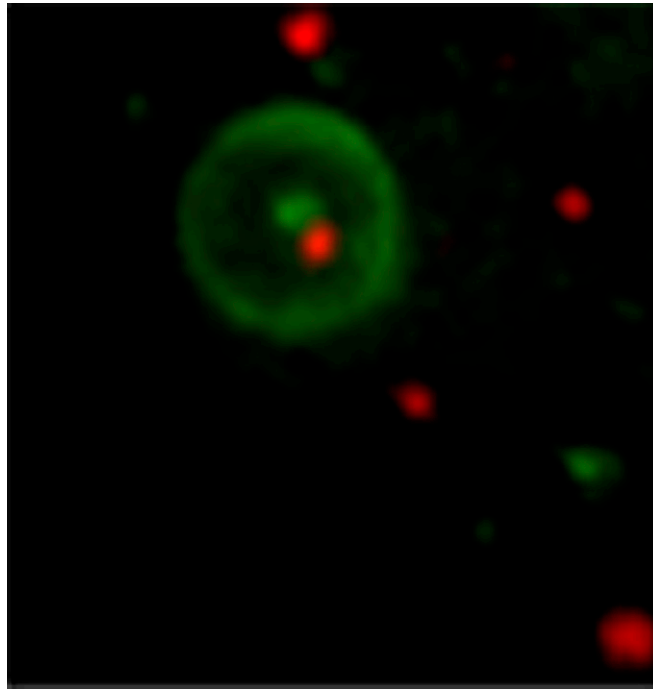

**Movie S1.** Dynamic interaction between GFP-LC3 and *A. phagocytophilum* inclusion. GFP-LC3-expressing cells were infected with mCherry-*A. phagocytophilum*. Green, GFP-LC3; red, mCherry-*A. phagocytophilum*.

[Movie S1](#)
